# Supplementary material for: Novel Coumarin-Containing Aminophosphonatesas Antitumor Agent: Synthesis, Cytotoxicity, DNA-Binding and Apoptosis Evaluation
Source: MDPI journal article supplement (doi:10.3390/molecules200814791), 2015-08-13
Supplement: s1 [file s1]

## Supplementary Materials

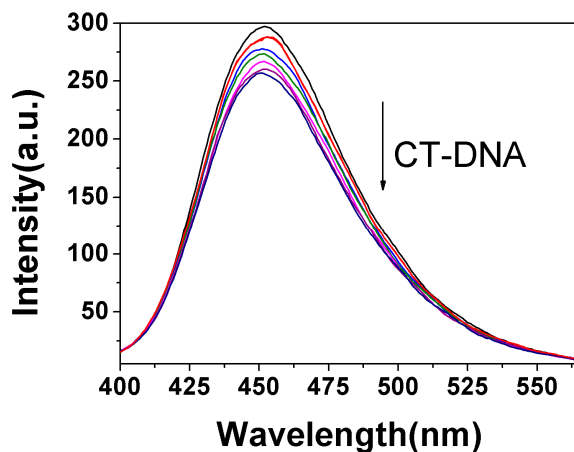

**Figure S1.** Spectrofluorimetric titration of **2** ( $2.0 \times 10^{-3}$  M) with CT DNA of increasing volume (0–450  $\mu$ L, only 0, 100, 200, 250, 350, 400 and 450  $\mu$ L are shown for clarity) in 2.5 mL Tris-HCl buffer (pH 7.2) at room temperature, ex 325 nm.

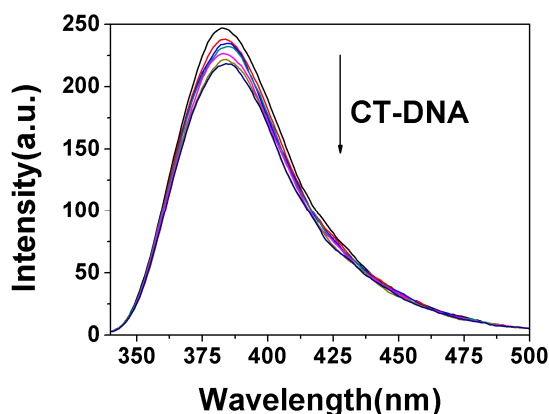

**Figure S2.** Spectrofluorimetric titration of **8a** ( $2.0 \times 10^{-3}$  M) with CT DNA of increasing volume (0–450  $\mu$ L, only 0, 100, 200, 250, 350, 400 and 450  $\mu$ L are shown for clarity) are shown for clarity in 2.5 mL Tris-HCl buffer (pH 7.2) at roomtemperature, ex 325 nm.

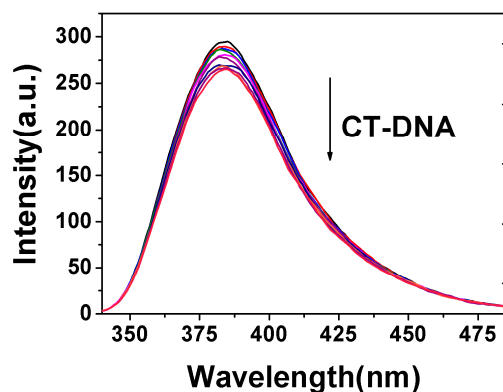

**Figure S3.** Spectrofluorimetric titration of **4b** ( $2.0 \times 10^{-3}$  M) with CT DNA of increasing volume (0–450  $\mu$ L, only 0, 50, 100, 150, 200, 250, 350, 400 and 450  $\mu$ L are shown for clarity) in 2.5 mL Tris-HCl buffer (pH 7.2) at room temperature, ex 325 nm.

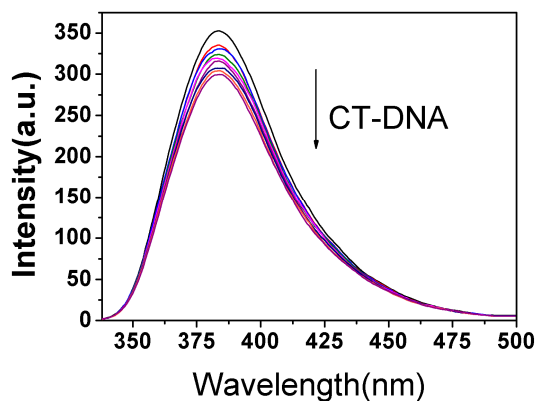

**Figure S4.** Spectrofluorimetric titration of **4c** ( $2.0 \times 10^{-3}$  M) with CT DNA of increasing volume (0–450  $\mu$ L, only 0, 100, 150, 200, 250, 350, 400 and 450  $\mu$ L are shown for clarity) in 2.5 mL Tris-HCl buffer (pH 7.2) at room temperature, ex 325 nm.

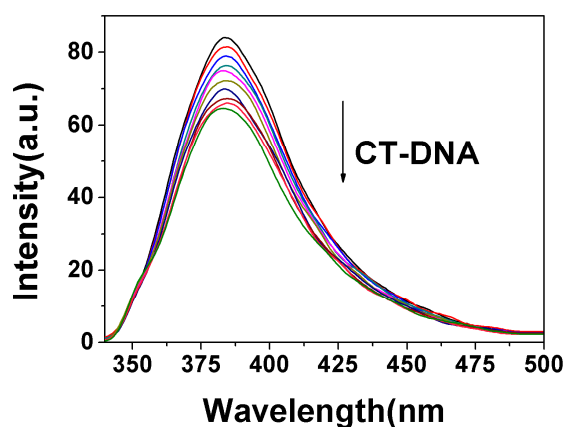

**Figure S5.** Spectrofluorimetric titration of **4d** ( $2.0 \times 10^{-3}$  M) with CT DNA of increasing volume (0–450  $\mu$ L) in 2.5 mL Tris-HCl buffer (pH 7.2) at room temperature, ex 325 nm.

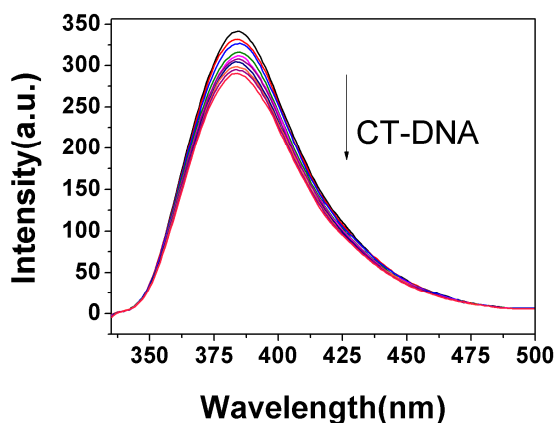

**Figure S6.** Spectrofluorimetric titration of **8e** ( $2.0 \times 10^{-3}$  M) with CT DNA of increasing volume (0–450  $\mu$ L) in 2.5 mL Tris-HCl buffer (pH 7.2) at room temperature, ex 325 nm.

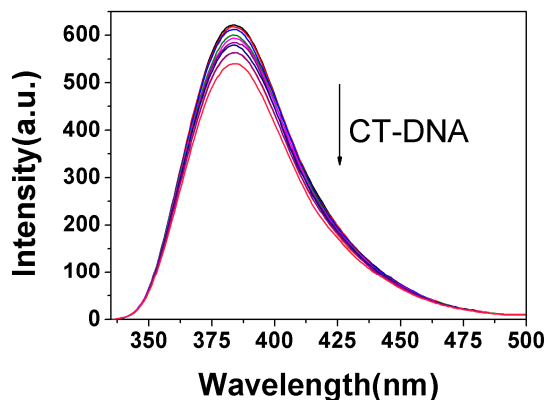

**Figure S7.** Spectrofluorimetric titration of **8f** ( $2.0 \times 10^{-3}$  M) with CT DNA of increasing volume (0–450  $\mu$ L) in 2.5 mL Tris-HCl buffer (pH 7.2) at room temperature, ex 325 nm.

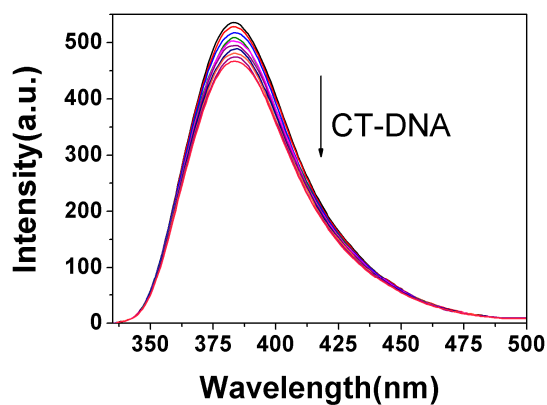

**Figure S8.** Spectrofluorimetric titration of **8g** ( $2.0 \times 10^{-3}$  M) with CT DNA of increasing volume (0–450  $\mu$ L) in 2.5 mL Tris-HCl buffer (pH 7.2) at room temperature, ex 325 nm.

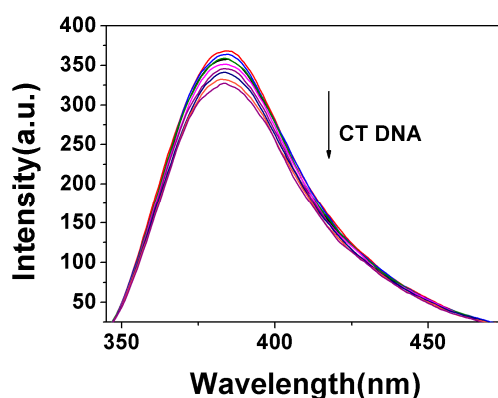

**Figure S9.** Spectrofluorimetric titration of **8h** ( $2.0 \times 10^{-3}$  M) with CT DNA of increasing volume (0–450  $\mu$ L, only 0, 50, 150, 200, 250, 350, 400 and 450  $\mu$ L are shown for clarity) in 2.5 mL Tris-HCl buffer (pH 7.2) at roomtemperature, ex 325 nm.

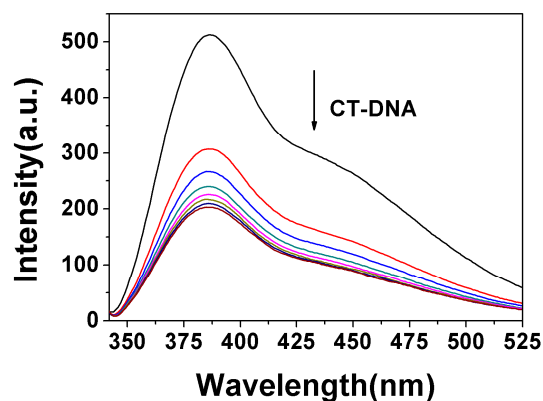

**Figure S10.** Spectrofluorimetric titration of **8i** ( $2.0 \times 10^{-3}$  M) with CT DNA of increasing volume (0, 50, 60, 70, 80, 90, 100, 110, 120, 130  $\mu$ L) in 2.5 mL Tris-HCl buffer (pH 7.2) at room temperature, ex 325 nm.

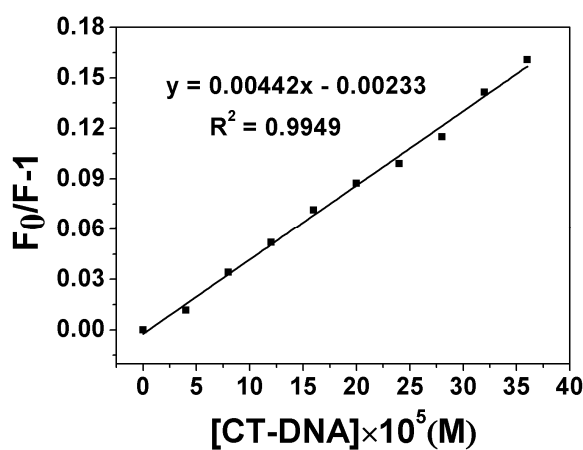

**Figure S11.** Plot of  $[\text{DNA}] \times 10^5$  vs.  $(F_0/F-1)$  of compound **2**.

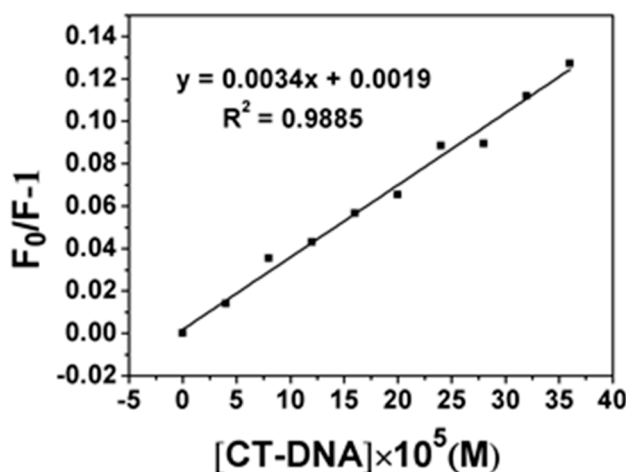

**Figure S12.** Plot of  $[\text{DNA}] \times 10^5$  vs.  $(F_0/F-1)$  of compound **8a**.

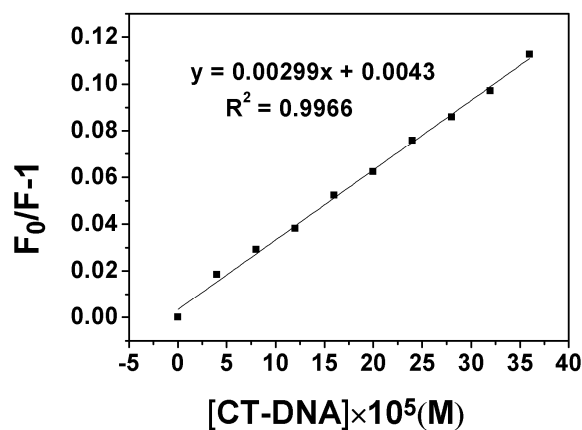

**Figure S13.** Plot of  $[DNA] \times 10^5$  vs.  $(F_0/F-1)$  of compound **8b**.

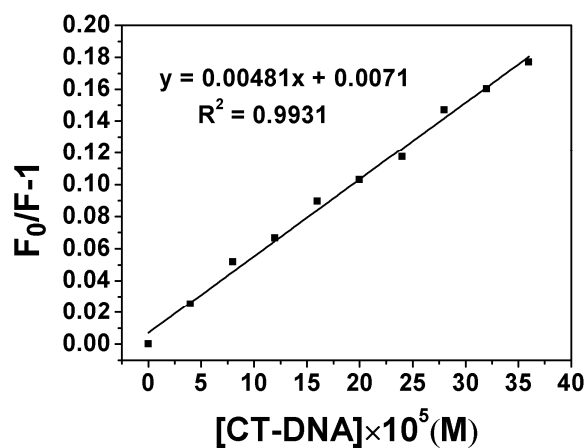

**Figure S14.** Plot of  $[DNA] \times 10^5$  vs.  $(F_0/F-1)$  of compound **8c**.

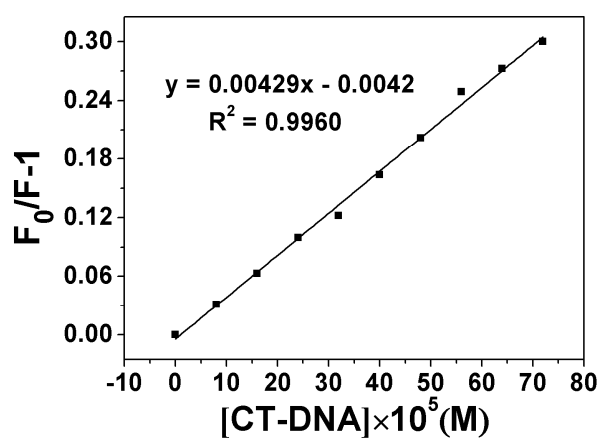

**Figure S15.** Plot of  $[DNA] \times 10^5$  vs.  $(F_0/F-1)$  of compound **8d**.

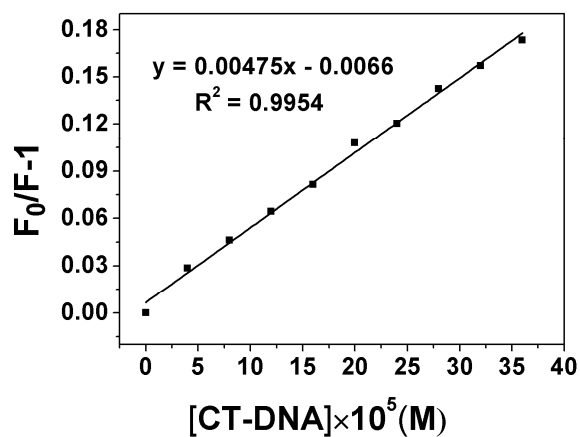

Figure S16. Plot of  $[DNA] \times 10^5$  vs.  $(F_0/F-1)$  of compound 8e.

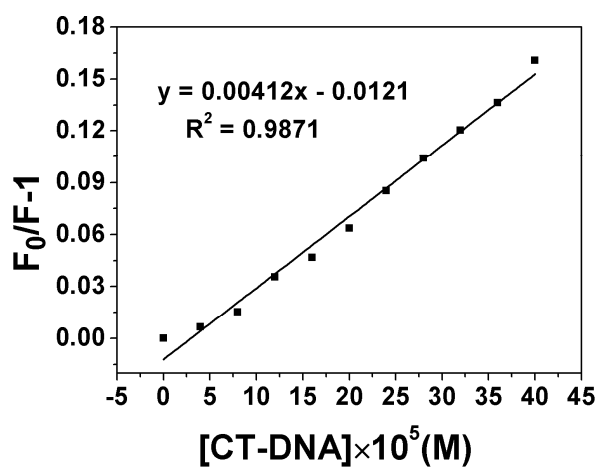

Figure S17. Plot of  $[DNA] \times 10^5$  vs.  $(F_0/F-1)$  of compound 8f.

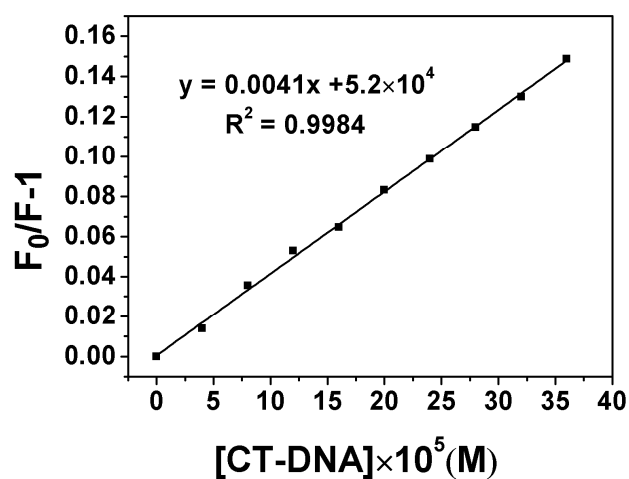

Figure S18. Plot of  $[DNA] \times 10^5$  vs.  $(F_0/F-1)$  of compound 8g.

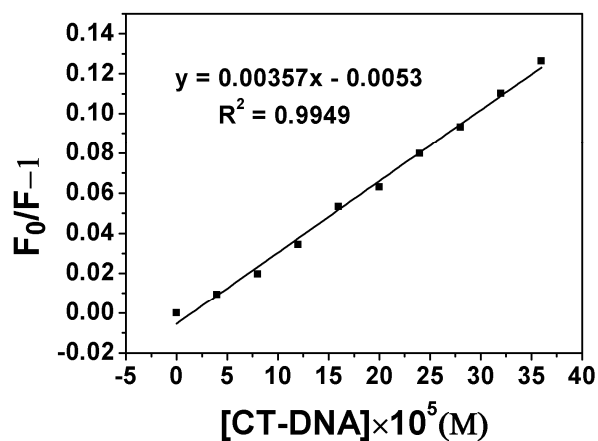

**Figure S19.** Plot of  $[DNA] \times 10^5$  vs.  $(F_0/F-1)$  of compound **8h**.

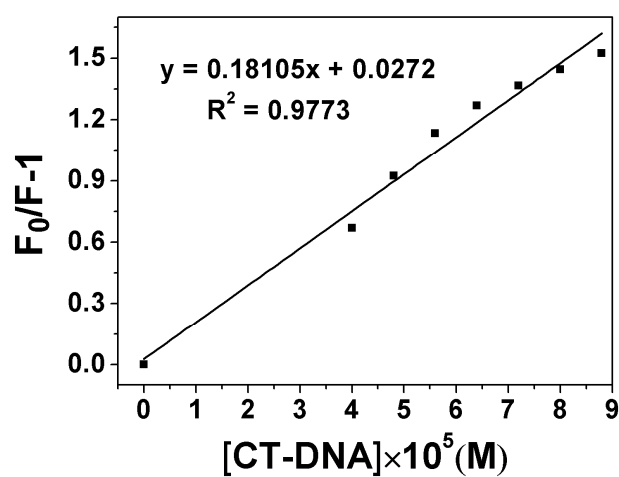

**Figure S20.** Plot of  $[DNA] \times 10^5$  vs.  $(F_0/F-1)$  of compound **8i**.

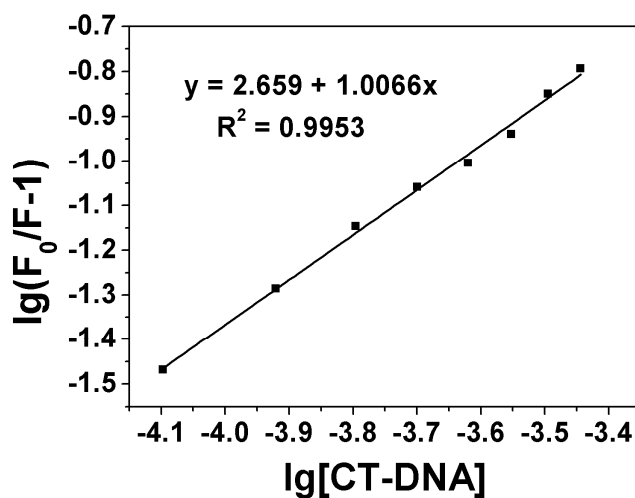

**Figure S21.** Plot of  $\lg[DNA]$  vs.  $\lg(F_0/F-1)$ ,  $K_b = 4.56 \times 10^2 \text{ M}^{-1}$  of compound **2**.

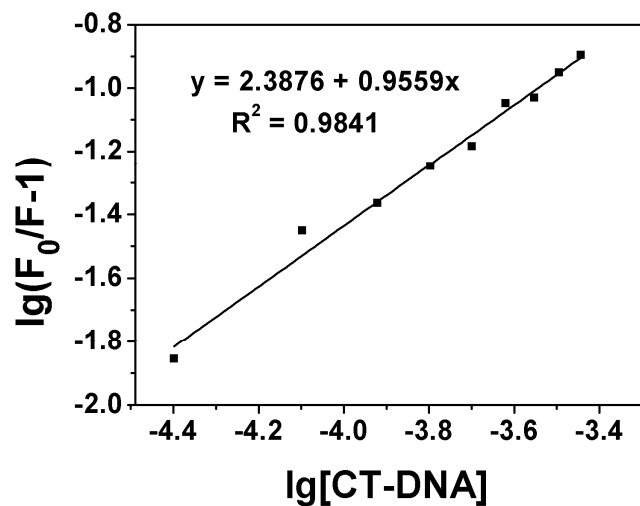

**Figure S22.** Plot of  $\lg[\text{DNA}]$  vs.  $\lg(F_0/F-1)$ ,  $K_b = 2.44 \times 10^2 \text{ M}^{-1}$  of compound **8a**.

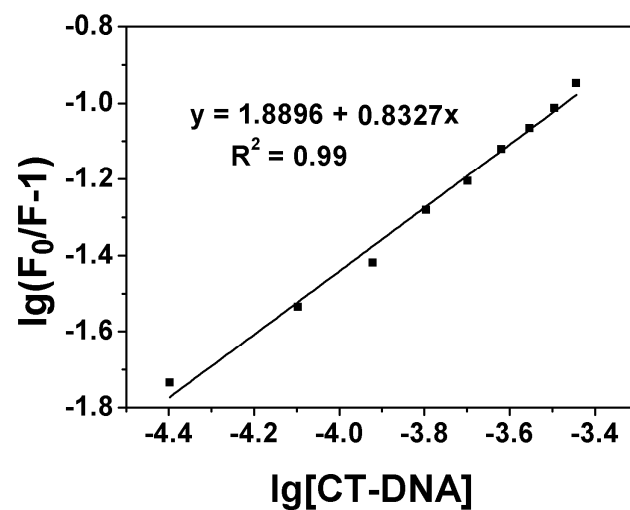

**Figure S23.** Plot of  $\lg[\text{DNA}]$  vs.  $\lg(F_0/F-1)$ ,  $K_b = 77.5 \text{ M}^{-1}$  of compound **8b**.

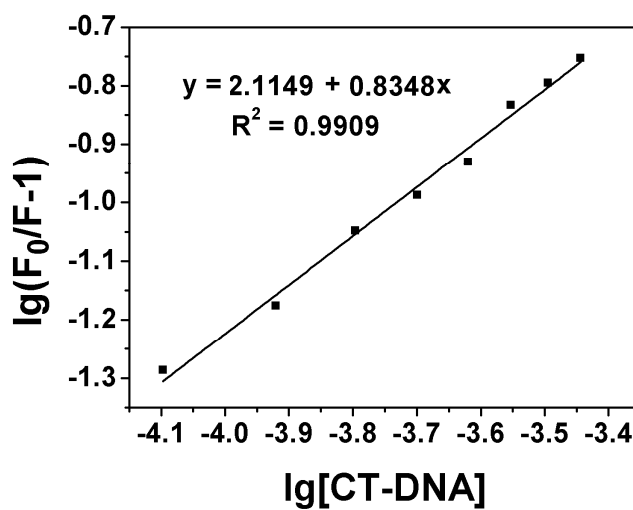

**Figure S24.** Plot of  $\lg[\text{DNA}]$  vs.  $\lg(F_0/F-1)$ ,  $K_b = 1.30 \times 10^2 \text{ M}^{-1}$  of compound **8c**.



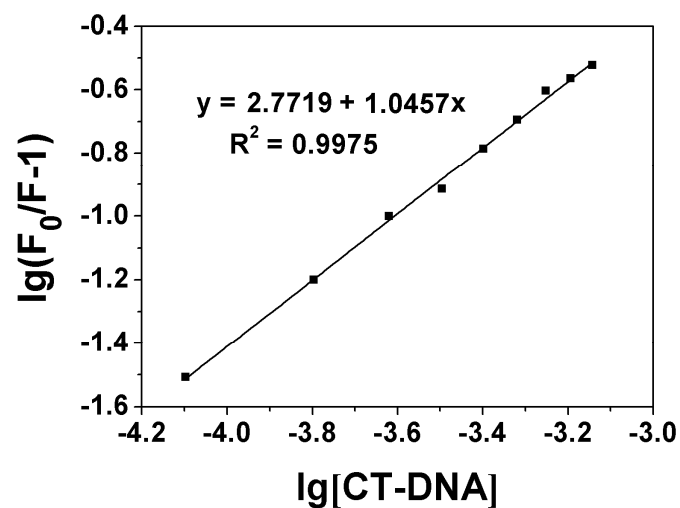

**Figure S25.** Plot of  $\lg[\text{DNA}]$  vs.  $\lg(F_0/F-1)$ ,  $K_b = 5.91 \times 10^2 \text{ M}^{-1}$  of compound **8d**.

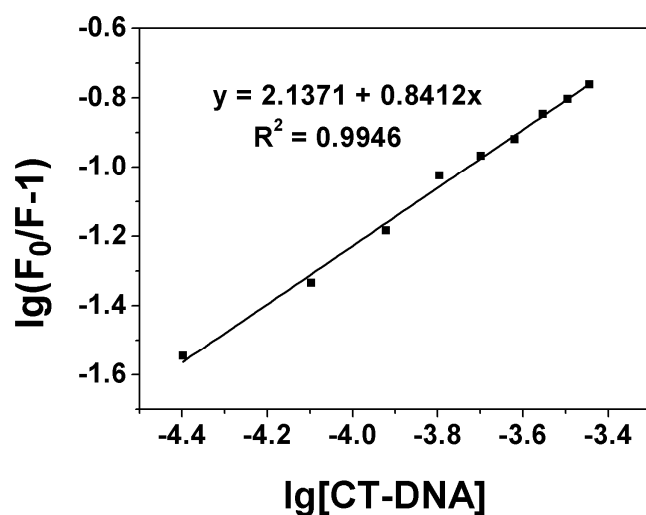

**Figure S26.** Plot of  $\lg[\text{DNA}]$  vs.  $\lg(F_0/F-1)$ ,  $K_b = 1.37 \times 10^2 \text{ M}^{-1}$  of compound **8e**.

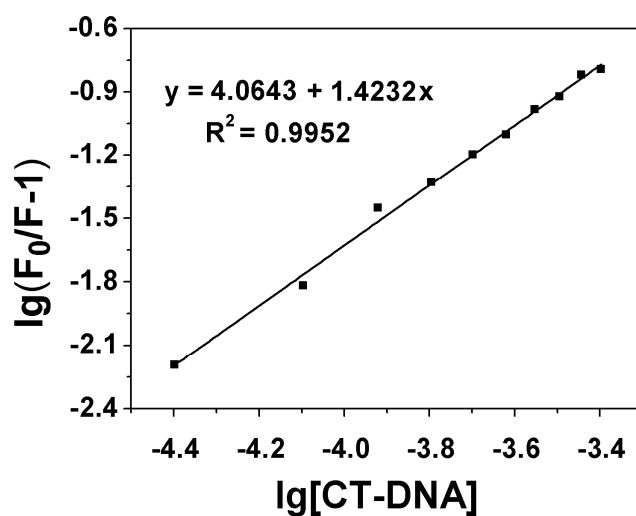

**Figure S27.** Plot of  $\lg[\text{DNA}]$  vs.  $\lg(F_0/F-1)$ ,  $K_b = 1.16 \times 10^4 \text{ M}^{-1}$  of compound **8f**.

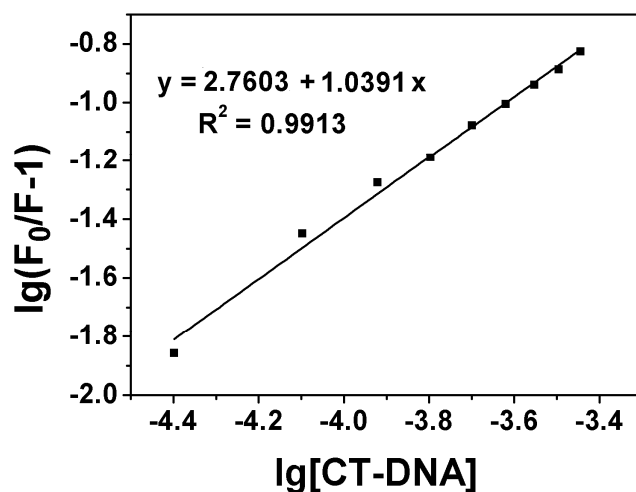

**Figure S28.** Plot of  $\lg[\text{DNA}]$  vs.  $\lg(F_0/F-1)$ ,  $K_b = 5.76 \times 10^2 \text{ M}^{-1}$  of compound **8g**.

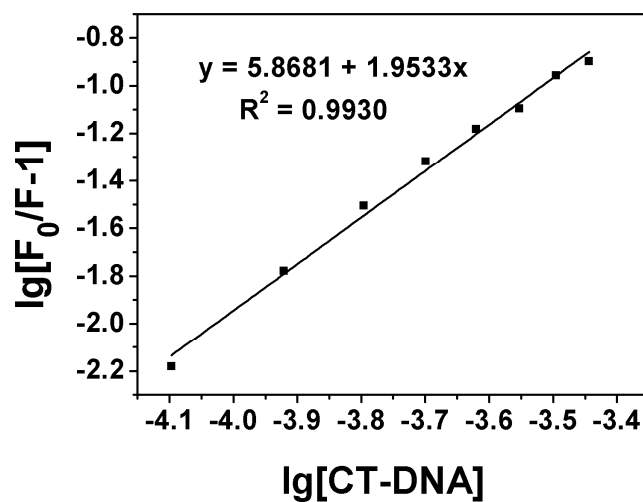

**Figure S29.** Plot of  $\lg[\text{DNA}]$  vs.  $\lg(F_0/F-1)$ ,  $K_b = 7.38 \times 10^5 \text{ M}^{-1}$  of compound **8h**.

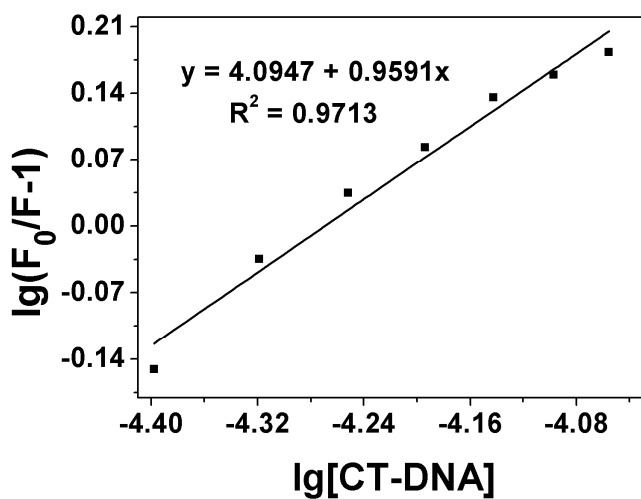

**Figure S30.** Plot of  $\lg[\text{DNA}]$  vs.  $\lg(F_0/F-1)$ ,  $K_b = 1.24 \times 10^4 \text{ M}^{-1}$  of compound **8i**.

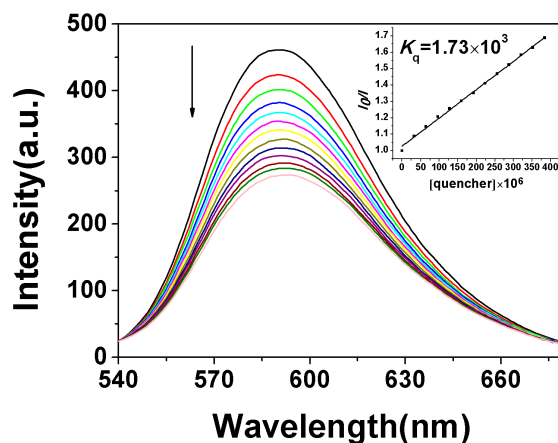

**Figure S31.** Emission spectra of DNA-GelRed (165  $\mu\text{M}$ ), in the presence of 0, 40, 80, 120, 160, 200, 240, 280, 320, 360 and 400  $\mu\text{M}$  of compound **8f**. Arrow indicates the changes in the emission intensity as a function of compound concentration. Inset: Stern-Volmer plot of the fluorescence titration data corresponding to the compound **8f**.

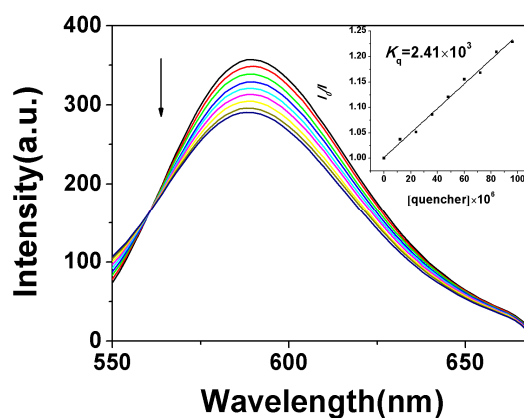

**Figure S32.** Emission spectra of DNA-GelRed (165  $\mu\text{M}$ ), in the presence of 0, 15, 30, 45, 60, 75, 90, 105 and 120  $\mu\text{M}$  of compound **8h**. Arrow indicates the changes in the emission intensity as a function of compound concentration. Inset: Stern-Volmer plot of the fluorescence titration data corresponding to the compound **8h**.

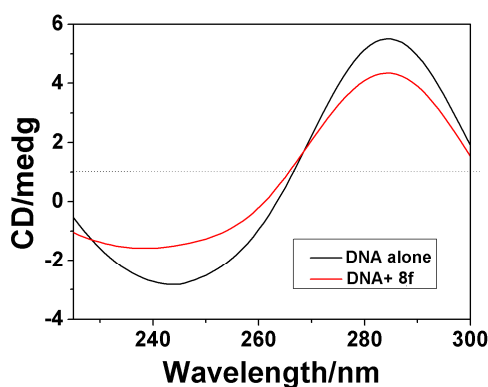

**Figure S33.** CD spectra of CT-DNA (3 mL solution,  $1.5 \times 10^{-4}$  M) in the absence and presence of compound **8f** ( $1.5 \times 10^{-5}$  M).

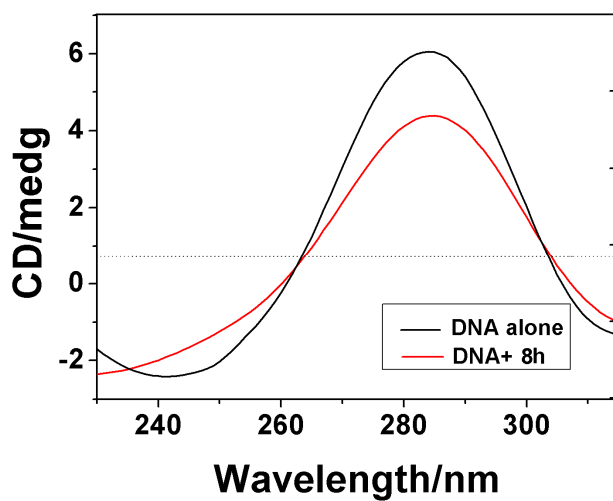

**Figure S34.** CD spectra of CT-DNA (3 mL solution,  $1.5 \times 10^{-4}$  M) in the absence and presence of compound **8h** ( $1.5 \times 10^{-5}$  M).

$^1\text{H-NMR}$  (500 MHz,  $\text{CDCl}_3$ ) for compound **3**:  $\delta$  7.42 (d,  $J = 8.8$  Hz, 1H), 6.75 (dd,  $J = 8.8, 2.5$  Hz, 1H), 6.70 (d,  $J = 2.5$  Hz, 1H), 6.09 (d,  $J = 1.1$  Hz, 1H), 4.27 (t,  $J = 6.3$  Hz, 2H), 2.76 (t,  $J = 6.3$  Hz, 2H), 2.34 (d,  $J = 1.1$  Hz, 3H).

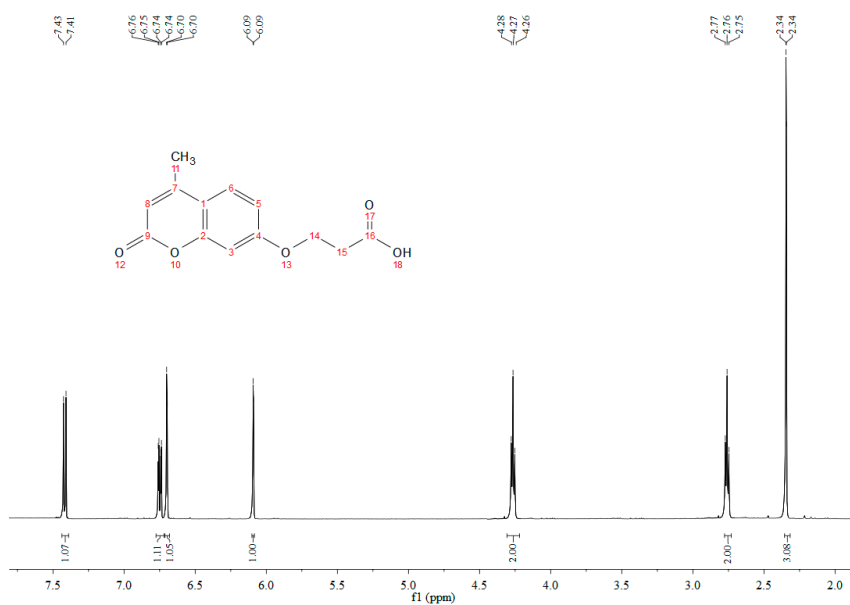

**Figure S35.** Spectrum of compound **3**.

$^1\text{H}$ -NMR (500 MHz,  $\text{CDCl}_3$ ) for compound **8a**:  $\delta$  7.53–7.49 (m, 2H), 7.42 (d,  $J = 8.8$  Hz, 1H), 7.29 (qd,  $J = 7.9$ , 1.3 Hz, 3H), 6.75 (dd,  $J = 8.8$ , 2.5 Hz, 1H), 6.70 (d,  $J = 2.5$  Hz, 1H), 6.09 (d,  $J = 1.1$  Hz, 1H), 5.61 (dd,  $J = 21.0$ , 9.7 Hz, 1H), 4.30–4.23 (m, 2H), 4.18–3.59 (m, 4H), 2.76 (t,  $J = 6.3$  Hz, 2H), 2.34 (d,  $J = 1.1$  Hz, 3H), 1.31 (t,  $J = 7.1$  Hz, 3H), 1.05 (t,  $J = 7.1$  Hz, 3H).  $^{31}\text{P}$ -NMR (202 MHz,  $\text{CDCl}_3$ )  $\delta$  (ppm) 21.49 (s). HRMS for  $\text{C}_{24}\text{H}_{29}\text{NO}_7\text{P}$  ( $[\text{M} + \text{H}]^+$ ): calcd 474.16816: found 474.16656.

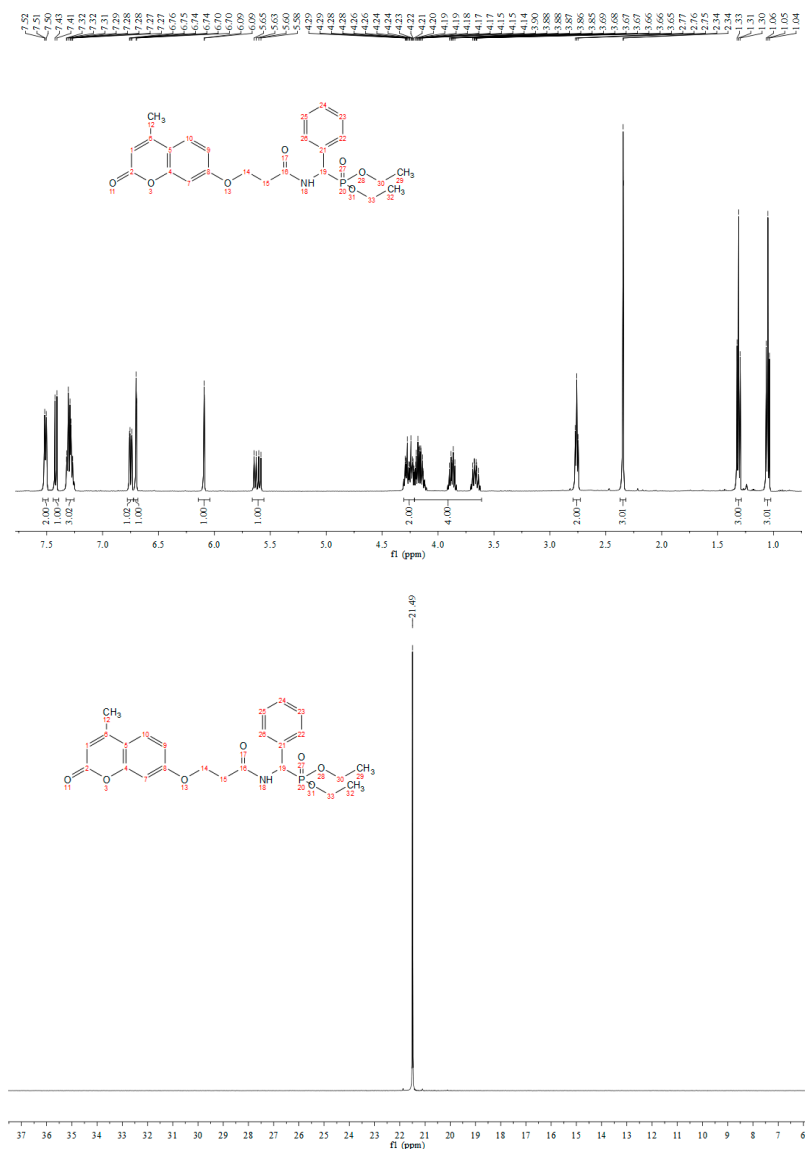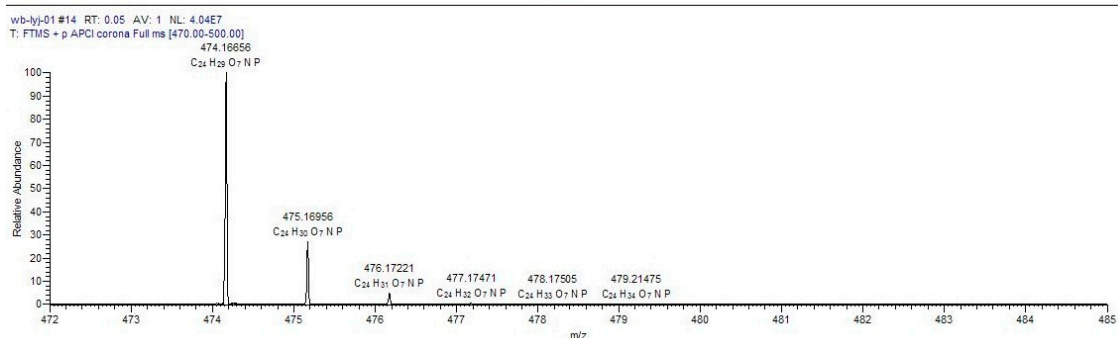

Figure S36. Spectrum of compound **8a**.

$^1\text{H}$ -NMR (500 MHz,  $\text{CDCl}_3$ ) for compound **8b**:  $\delta$  (ppm) 8.30 (d,  $J = 7.4$  Hz, 1H), 7.46 (ddd,  $J = 8.6$ , 5.1, 2.0 Hz, 2H), 7.41 (d,  $J = 8.8$  Hz, 1H), 6.97 (t,  $J = 8.6$  Hz, 2H), 6.73 (dd,  $J = 8.8$ , 2.5 Hz, 1H), 6.70 (d,  $J = 2.4$  Hz, 1H), 6.08 (d,  $J = 1.1$  Hz, 1H), 5.56 (dd,  $J = 21.0$ , 9.6 Hz, 1H), 4.25 (ddd,  $J = 15.5$ , 9.3, 3.1 Hz, 2H), 4.18–3.65 (m, 4H), 2.74 (t,  $J = 6.2$  Hz, 2H), 2.34 (d,  $J = 1.1$  Hz, 3H), 1.29 (t,  $J = 7.1$  Hz, 3H), 1.07 (t,  $J = 7.1$  Hz, 3H).  $^{31}\text{P}$ -NMR (202 MHz,  $\text{CDCl}_3$ )  $\delta$  (ppm) 21.20 (d,  $J = 4.3$  Hz). HRMS for  $\text{C}_{24}\text{H}_{28}\text{NO}_7$  FP ( $[\text{M} + \text{H}]^+$ ): calcd 492.15874; found 492.15732.

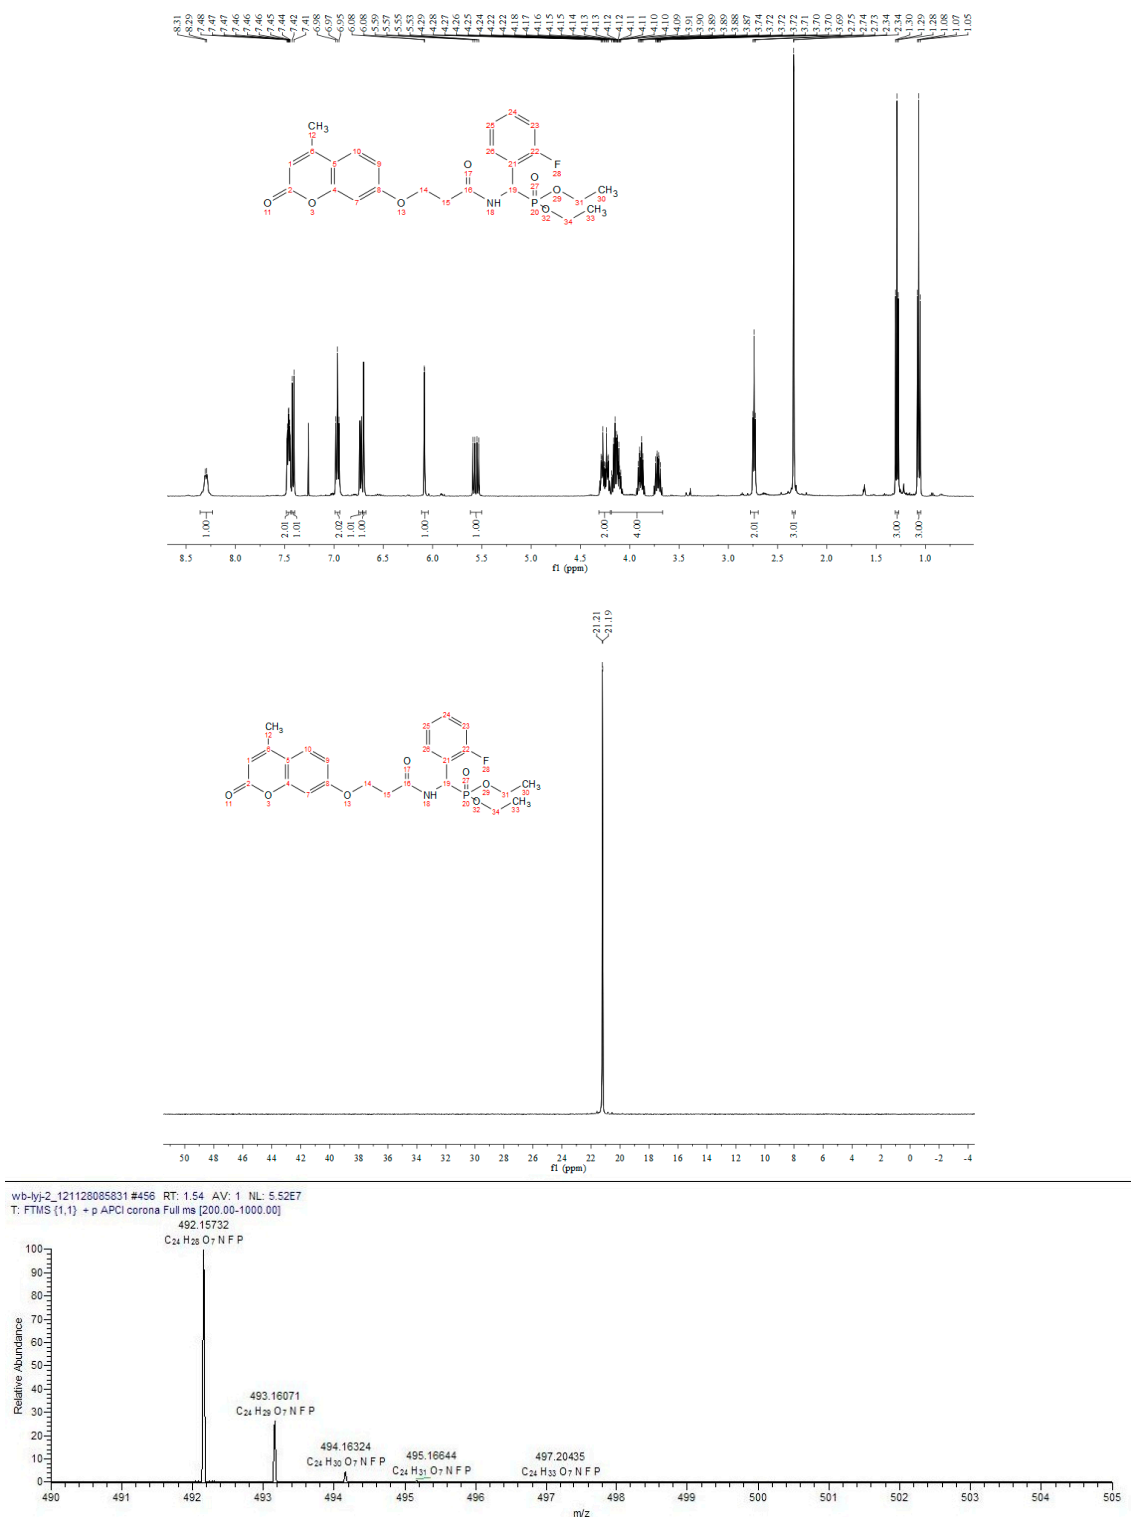

Figure S37. Spectrum of compound **8b**.

$^1\text{H}$ -NMR (500 MHz,  $\text{CDCl}_3$ ) for compound **8c**:  $\delta$  (ppm) 8.01 (s, 1H), 7.47 (d,  $J = 8.8$  Hz, 1H), 7.42–7.21 (m, 4H), 6.81 (dd,  $J = 8.8, 2.5$  Hz, 1H), 6.75 (d,  $J = 2.4$  Hz, 1H), 6.22–6.16 (m, 1H), 6.14 (s, 1H), 4.36–4.30 (m, 2H), 4.30–3.64 (m, 4H), 2.79 (td,  $J = 6.1, 2.6$  Hz, 2H), 2.39 (d,  $J = 0.8$  Hz, 3H), 1.36 (t,  $J = 7.1$  Hz, 3H), 1.06 (t,  $J = 7.0$  Hz, 3H).  $^{31}\text{P}$ -NMR (202 MHz,  $\text{CDCl}_3$ )  $\delta$  (ppm) 20.72(s). HRMS for  $\text{C}_{24}\text{H}_{28}\text{NO}_7$   $[\text{M} + \text{H}]^+$ : calcd 508.12919; found 508.12781.

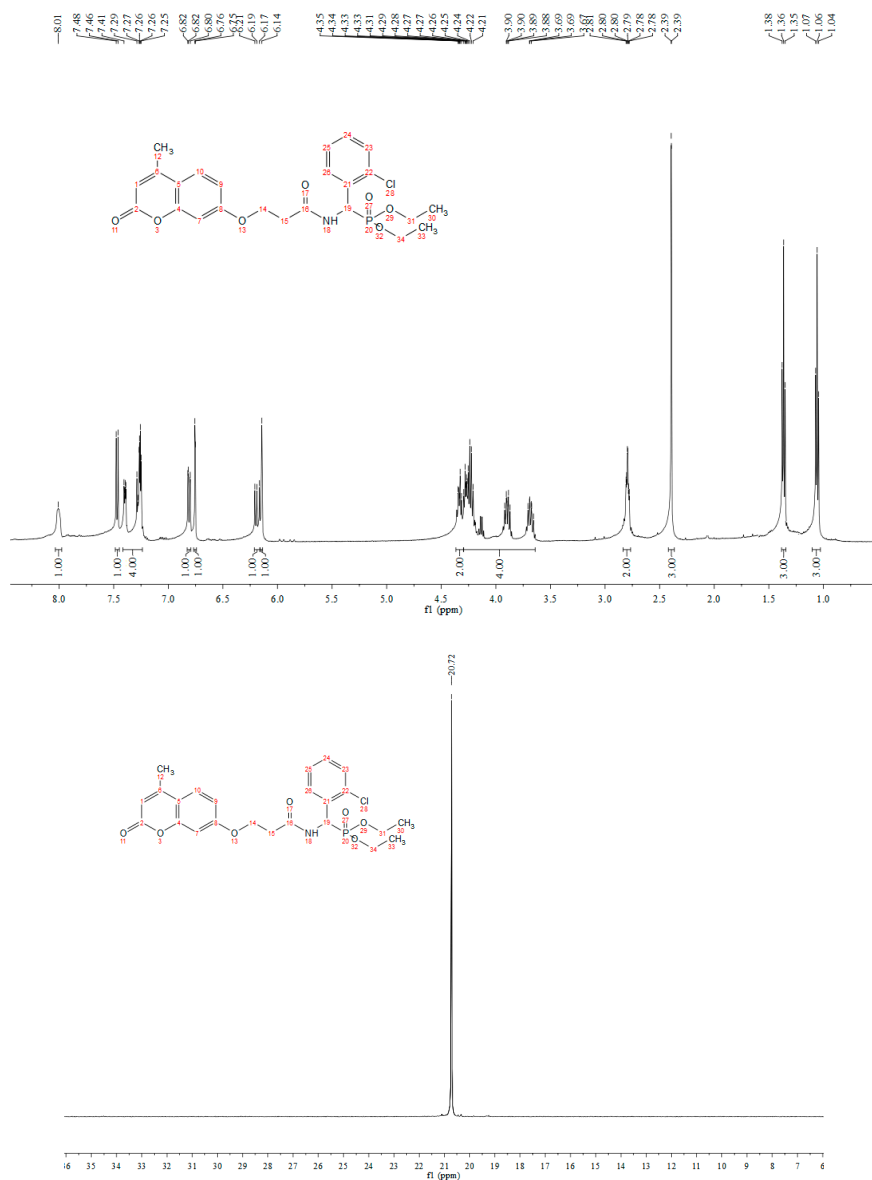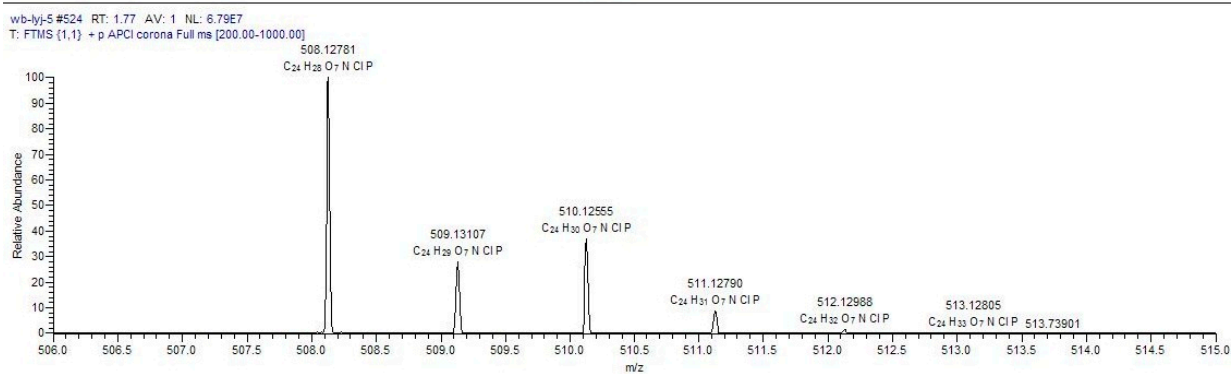

Figure S38. Spectrum of compound **8c**.

$^1\text{H}$ -NMR (500 MHz,  $\text{CDCl}_3$ ) for compound **8d**:  $\delta$  (ppm) 8.21 (s, 1H), 7.46 (dd,  $J = 8.5, 2.2$  Hz, 1H), 7.42 (d,  $J = 8.3$  Hz, 2H), 7.29 (dd,  $J = 8.3, 1.6$  Hz, 2H), 6.78 (d,  $J = 2.5$  Hz, 1H), 6.76 (s, 1H), 6.13 (d,  $J = 1.0$  Hz, 1H), 5.58 (dd,  $J = 21.3, 9.5$  Hz, 1H), 4.40–4.23 (m, 2H), 4.21–3.72 (m, 4H), 2.78 (t,  $J = 6.0$  Hz, 2H), 2.38 (d,  $J = 1.0$  Hz, 3H), 1.32 (t,  $J = 7.0$  Hz, 3H), 1.12 (dd,  $J = 7.7, 6.4$  Hz, 3H).  $^{31}\text{P}$ -NMR (202 MHz,  $\text{CDCl}_3$ )  $\delta$  (ppm) 21.21 (s). HRMS for  $\text{C}_{24}\text{H}_{28}\text{NO}_7$  PCl ( $[\text{M} + \text{H}]^+$ ): calcd 508.12919; found 508.12775.

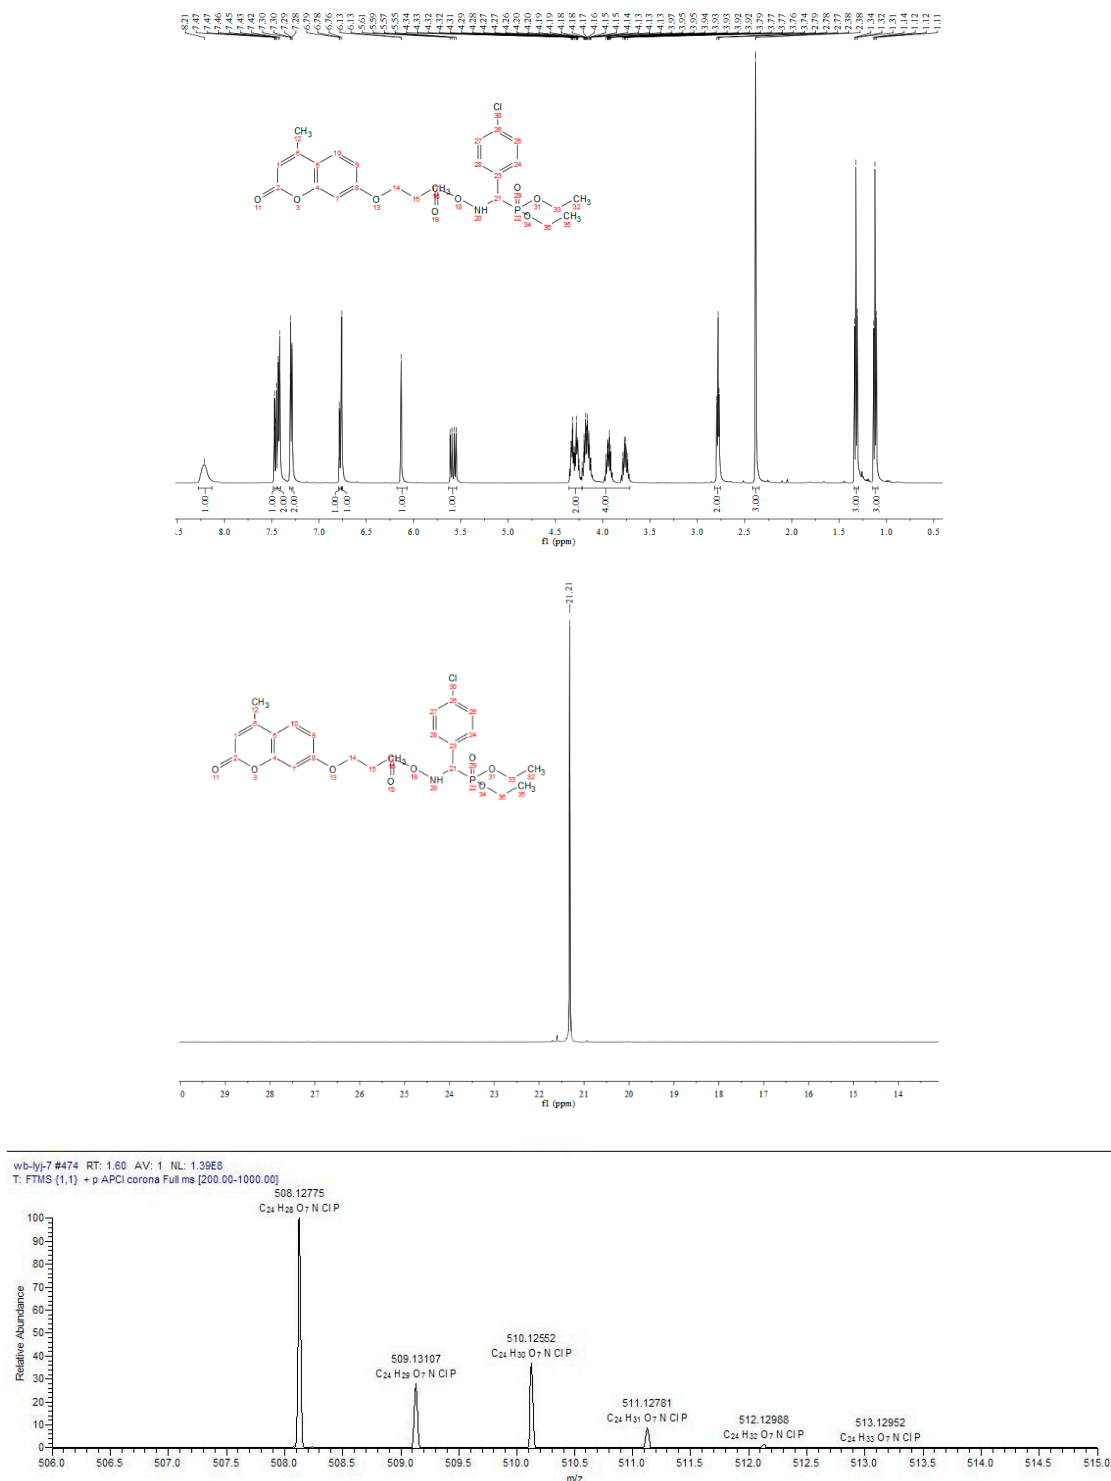

Figure S39. Spectrum of compound **8d**.



$^1\text{H}$ -NMR (500 MHz,  $\text{CDCl}_3$ ) for compound **8e**:  $\delta$  (ppm) 8.67 (s, 1H), 7.75 (d,  $J = 7.8$  Hz, 1H), 7.53 (d,  $J = 8.0$  Hz, 1H), 7.40 (dd,  $J = 8.8, 1.2$  Hz, 1H), 7.27 (dd,  $J = 12.7, 5.2$  Hz, 1H), 7.12 (dd,  $J = 11.0, 4.3$  Hz, 1H), 6.73 (dd,  $J = 8.8, 2.4$  Hz, 1H), 6.67 (d,  $J = 2.3$  Hz, 1H), 6.20 (dd,  $J = 21.0, 9.3$  Hz, 1H), 6.07 (s, 1H), 4.34–4.23 (m, 2H), 4.24–3.58 (m, 4H), 2.77 (q,  $J = 6.1$  Hz, 2H), 2.33 (s, 3H), 1.34 (t,  $J = 7.1$  Hz, 3H), 1.02 (t,  $J = 7.1$  Hz, 3H).  $^{31}\text{P}$ -NMR (202 MHz,  $\text{CDCl}_3$ )  $\delta$  (ppm) 20.85 (s). HRMS for  $\text{C}_{24}\text{H}_{28}\text{NO}_7\text{PBr}$  ( $[\text{M} + \text{H}]^+$ ): calcd 552.07868; found 552.07666.

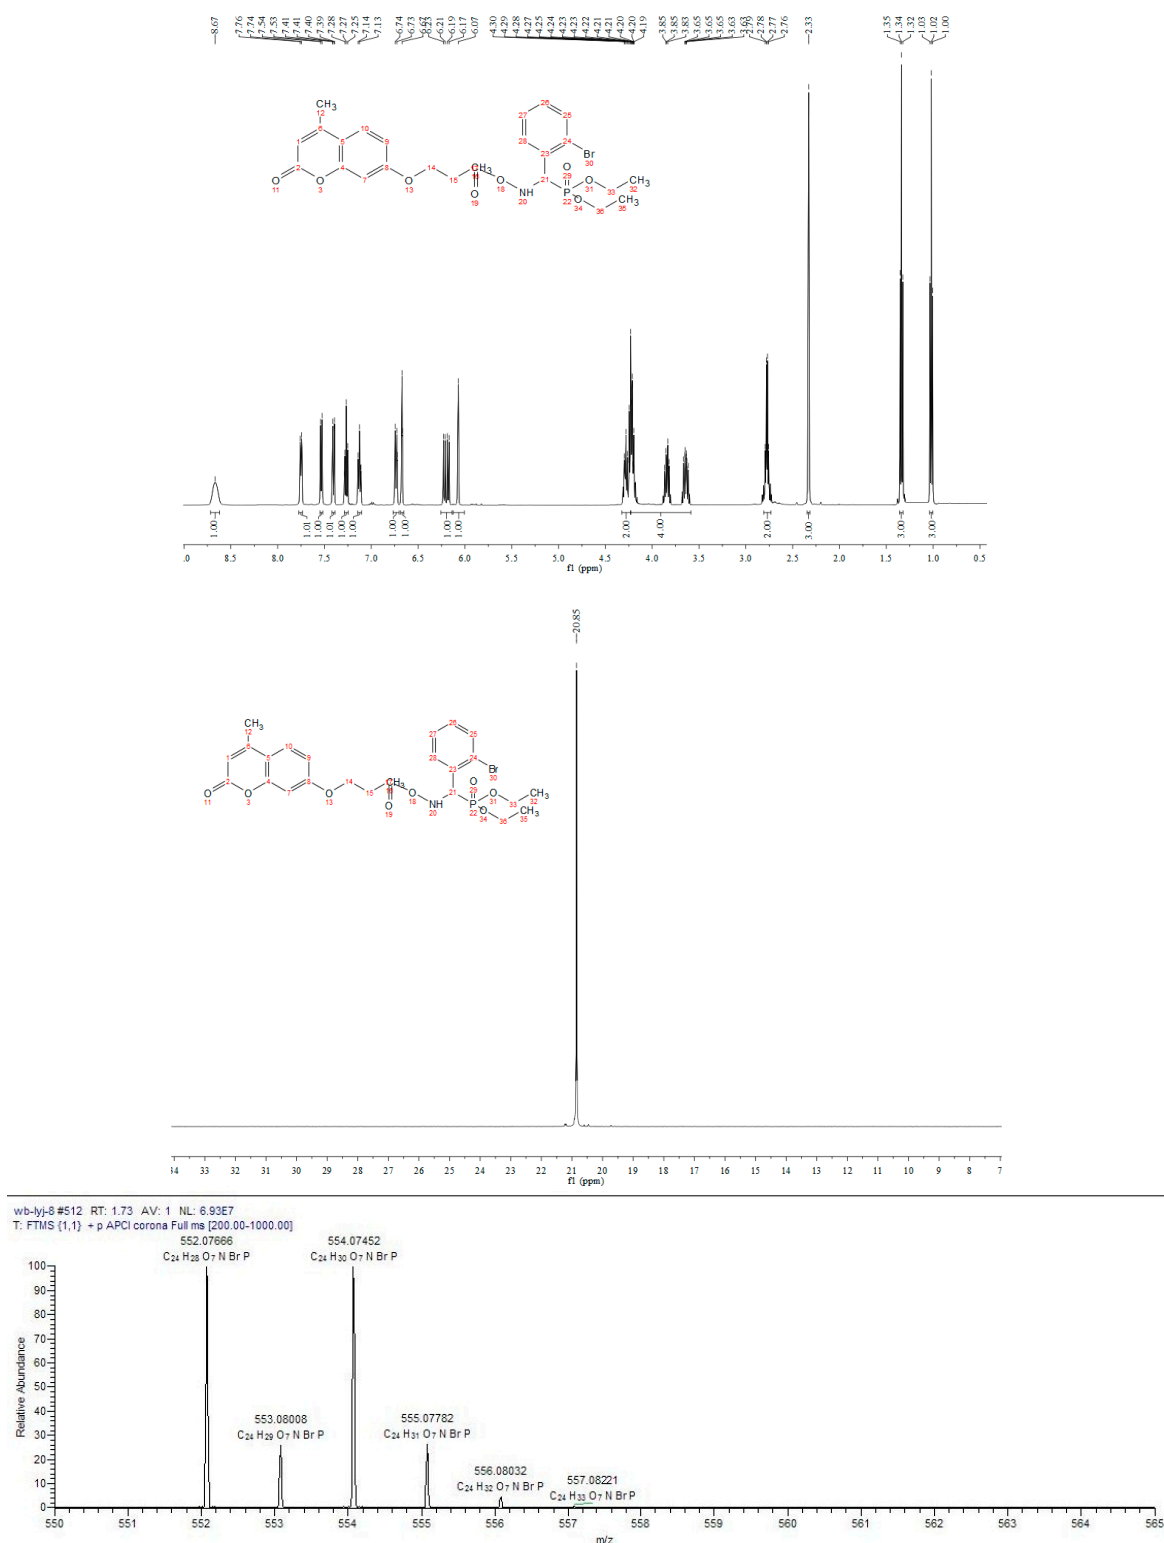

Figure S40. Spectrum of compound **8e**.

$^1\text{H}$ -NMR (500 MHz,  $\text{CDCl}_3$ ) for compound **8f**:  $\delta$  (ppm) 8.36 (d,  $J = 5.7$  Hz, 1H), 7.67 (d,  $J = 1.5$  Hz, 1H), 7.44 (dd,  $J = 15.1, 8.4$  Hz, 2H), 7.20 (t,  $J = 7.8$  Hz, 1H), 6.79 (dd,  $J = 8.8, 2.4$  Hz, 1H), 6.74 (d,  $J = 2.4$  Hz, 1H), 6.13 (d,  $J = 0.7$  Hz, 1H), 5.58 (dd,  $J = 21.3, 9.5$  Hz, 1H), 4.30 (dq,  $J = 9.3, 6.4$  Hz, 2H), 4.26–3.73 (m, 4H), 2.79 (t,  $J = 6.1$  Hz, 2H), 2.38 (d,  $J = 0.5$  Hz, 3H), 1.33 (t,  $J = 7.1$  Hz, 3H), 1.12 (t,  $J = 7.1$  Hz, 3H).  $^{31}\text{P}$ -NMR (202 MHz,  $\text{CDCl}_3$ )  $\delta$  (ppm) 21.71 (s). HRMS for  $\text{C}_{24}\text{H}_{28}\text{NO}_7\text{PBr}$  ( $[\text{M} + \text{H}]^+$ ): calcd 552.07868; found 552.07642.

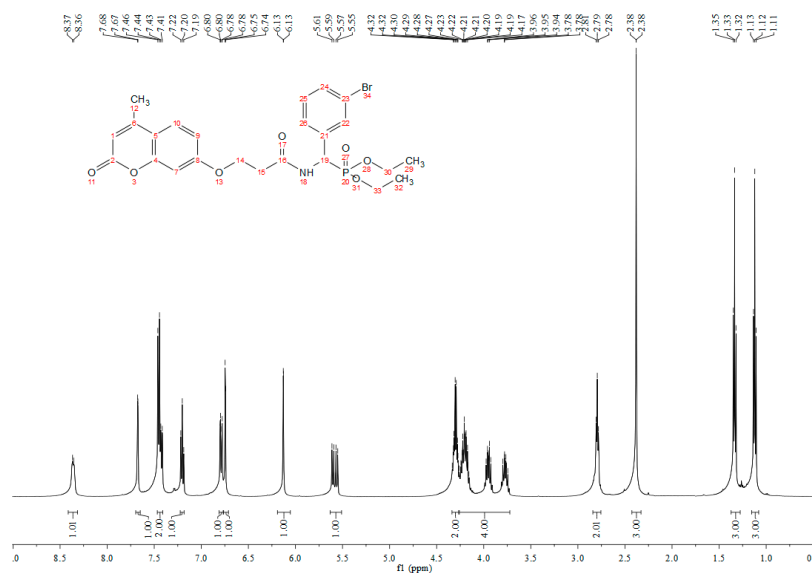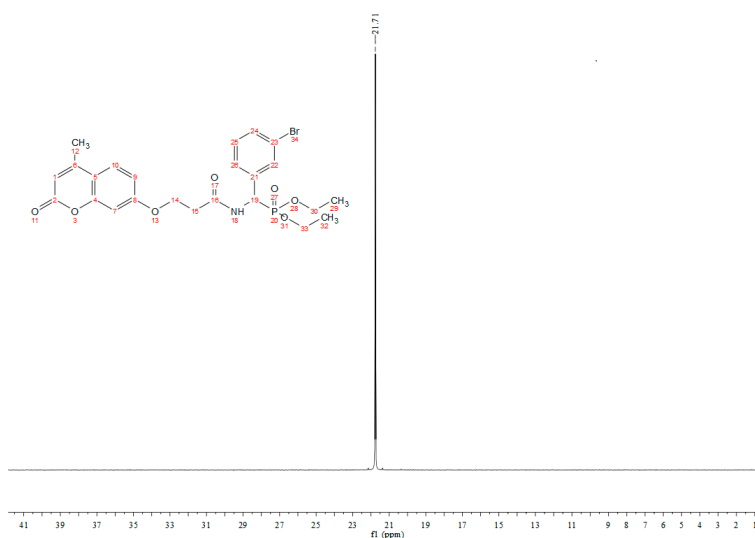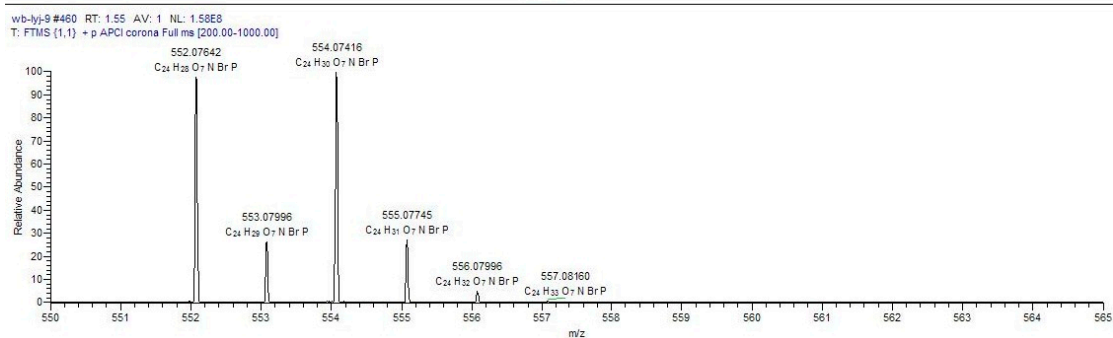

Figure S41. Spectrum of compound **8f**.

$^1\text{H}$ -NMR (500 MHz,  $\text{CDCl}_3$ ) for compound **8g**:  $\delta$  (ppm) 8.23 (dd,  $J = 9.5, 4.1$  Hz, 1H), 7.43 (d,  $J = 8.1$  Hz, 2H), 7.41 (s, 1H), 7.33 (dd,  $J = 8.5, 2.0$  Hz, 2H), 6.75 dd,  $J = 8.8, 2.4$  Hz, 1H), 6.73 (d,  $J = 2.3$  Hz, 1H), 6.10 (d,  $J = 1.2$  Hz, 1H), 5.54 (dd,  $J = 21.3, 9.5$  Hz, 1H), 4.32–4.21 (m, 2H), 4.19–3.70 (m, 4H), 2.75 (t,  $J = 6.1$  Hz, 2H), 2.35 (d,  $J = 1.2$  Hz, 3H), 1.29 (t,  $J = 7.1$  Hz, 3H), 1.09 (t,  $J = 7.1$  Hz, 3H).  $^{31}\text{P}$ -NMR (202 MHz,  $\text{CDCl}_3$ )  $\delta$  (ppm) 20.87 (s). HRMS for  $\text{C}_{24}\text{H}_{28}\text{NO}_7\text{PBr}$  ( $[\text{M} + \text{H}]^+$ ): calcd 552.07868; found 552.07629.

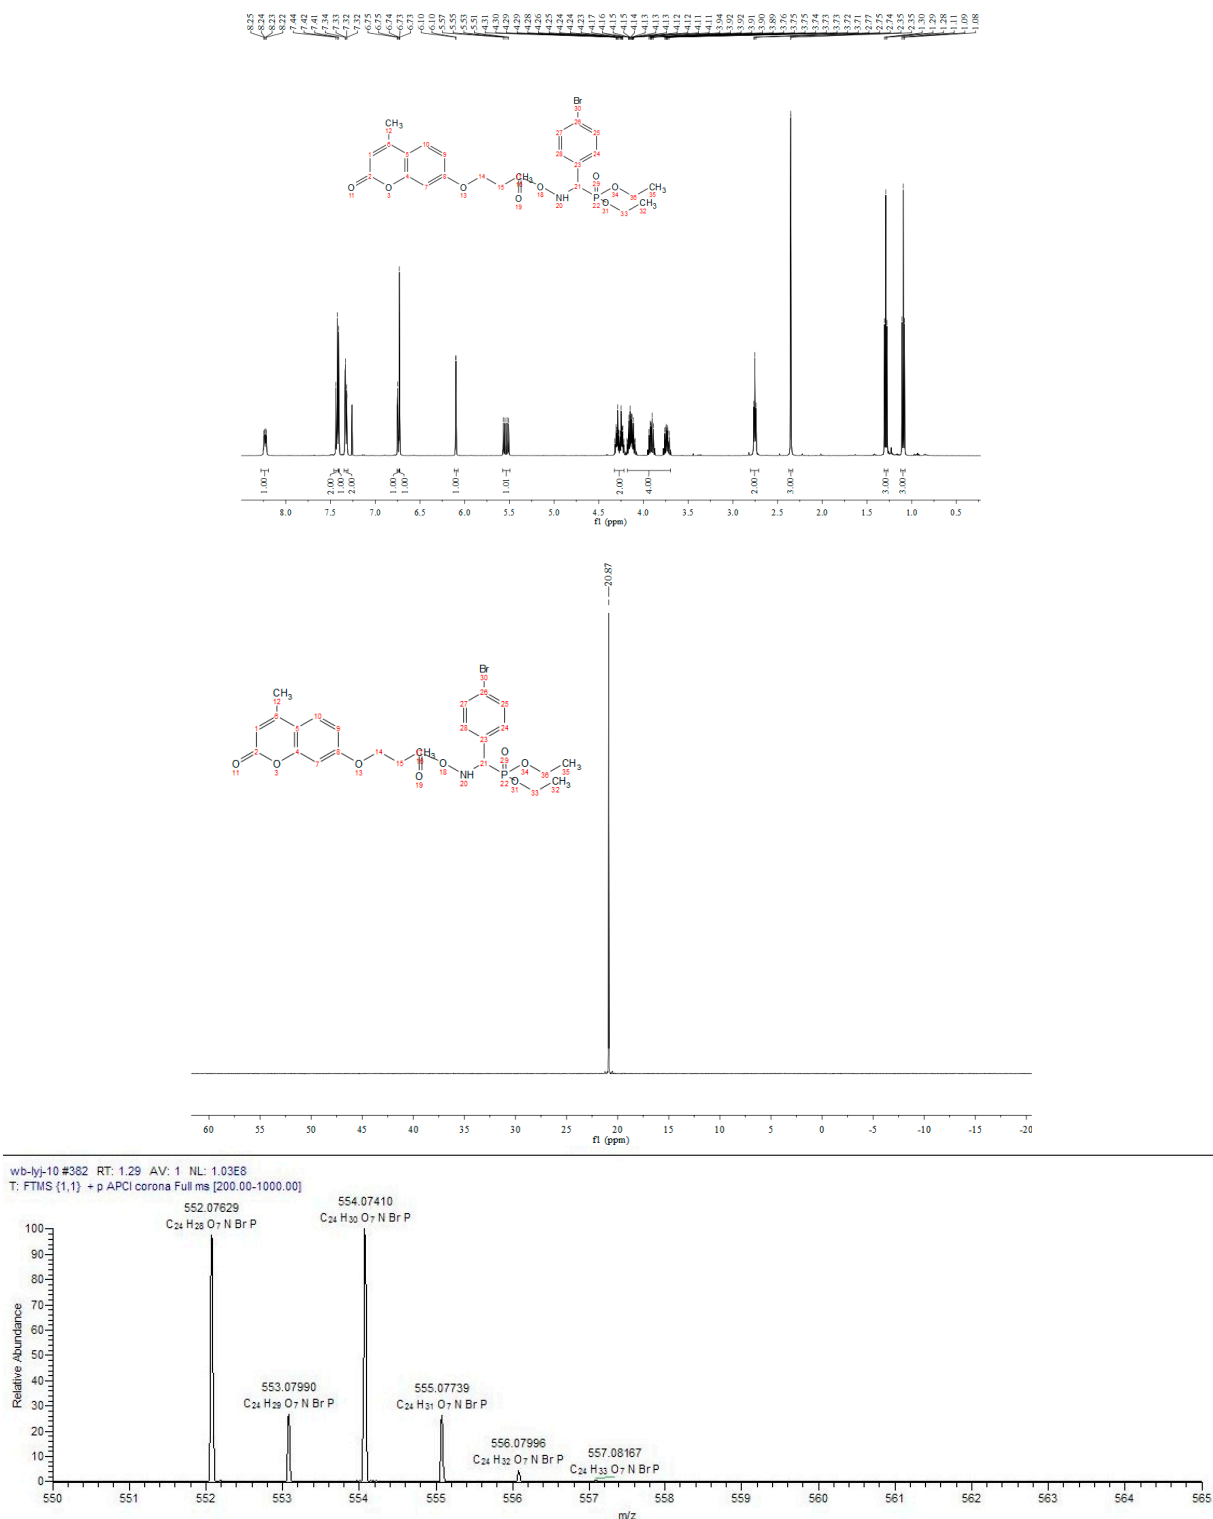

**Figure S42.** Spectrum of compound **8g**.

$^1\text{H}$ -NMR (500 MHz,  $\text{CDCl}_3$ ) for complex **8h**:  $\delta$  (ppm) 8.08 (dd,  $J = 9.7, 2.9$  Hz, 1H), 7.57–7.45 (m, 1H), 7.39 (d,  $J = 8.8$  Hz, 1H), 7.24–7.18 (m, 1H), 6.91–6.81 (m, 2H), 6.74 (dd,  $J = 8.8, 2.5$  Hz, 1H), 6.68 (d,  $J = 2.5$  Hz, 1H), 6.14–6.08 (m, 1H), 6.06 (d,  $J = 1.2$  Hz, 1H), 4.30–4.20 (m, 2H), 4.19–3.70 (m, 4H), 3.82 (s, 3H), 2.73 (dd,  $J = 10.4, 6.1$  Hz, 2H), 2.32 (d,  $J = 1.0$  Hz, 3H), 1.28 (t,  $J = 7.1$  Hz, 3H), 0.98 (t,  $J = 7.1$  Hz, 3H).  $^{31}\text{P}$ -NMR (202 MHz,  $\text{CDCl}_3$ )  $\delta$  (ppm) 22.05 (s). HRMS for  $\text{C}_{25}\text{H}_{31}\text{NO}_8$  P ( $[\text{M} + \text{H}]^+$ ): calcd 504.17873; found 504.17688.

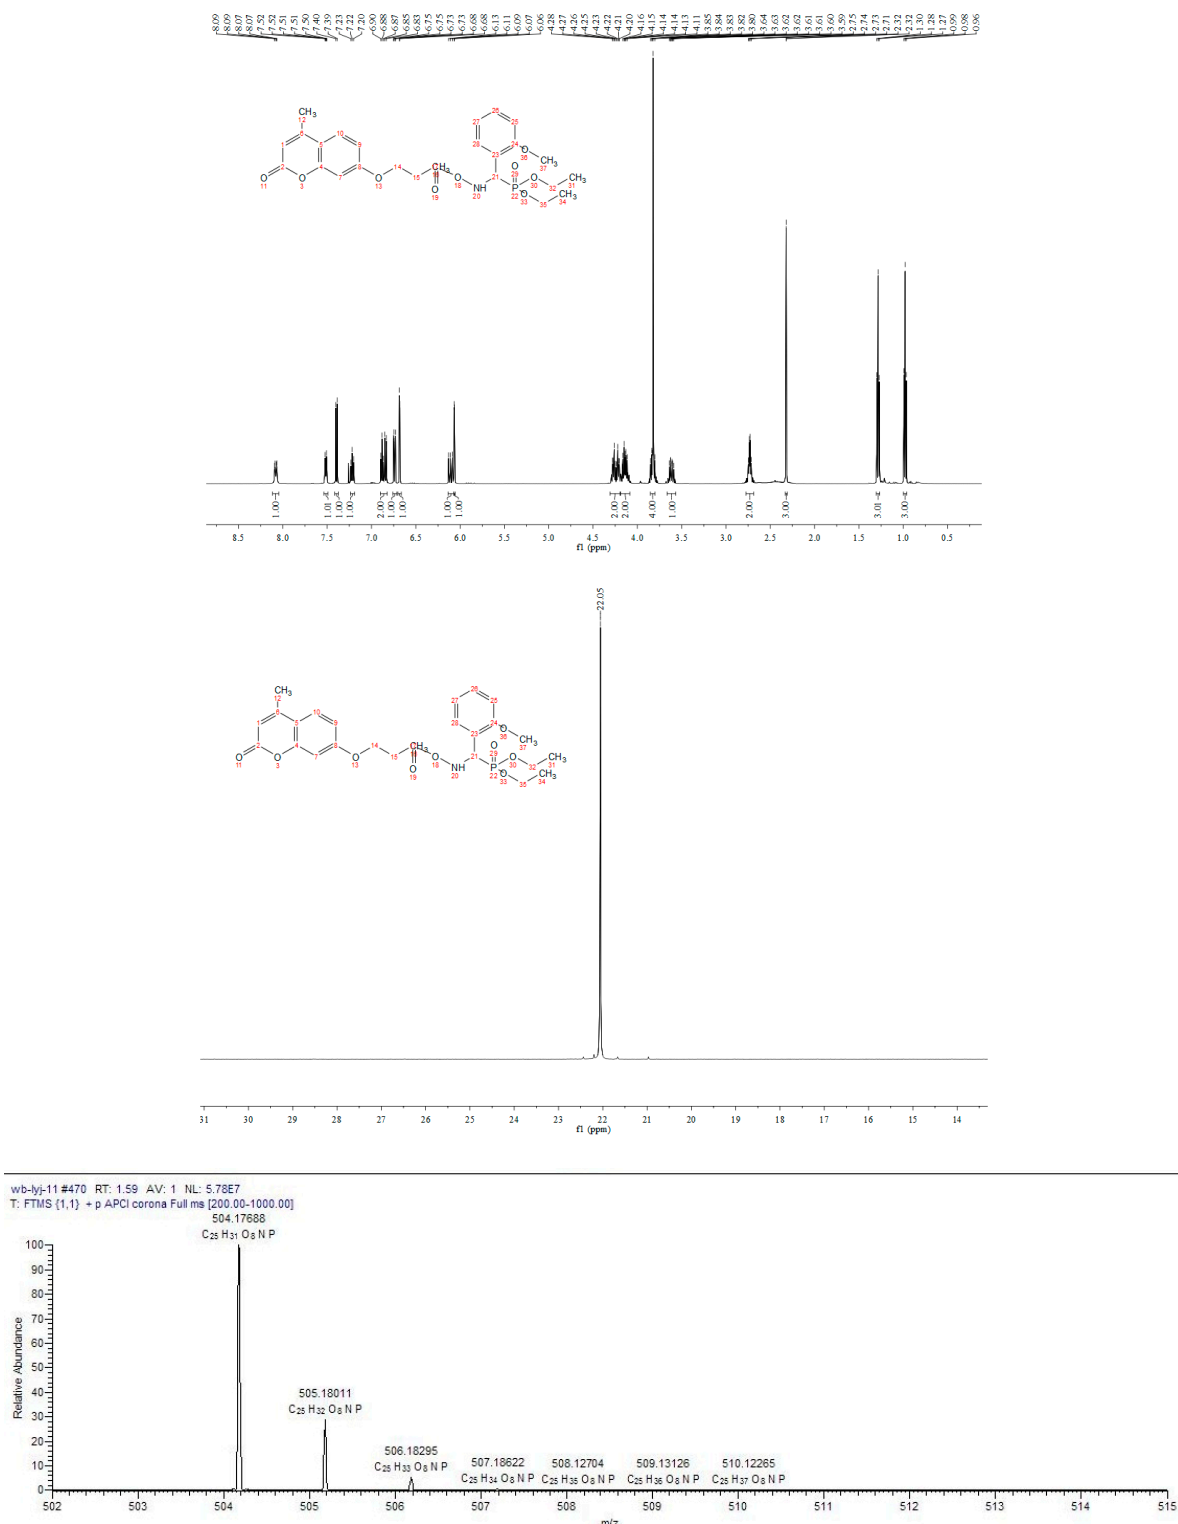

**Figure S43.** Spectrum of compound **8h**.

$^1\text{H}$ -NMR (500 MHz,  $\text{CDCl}_3$ ) for complex **8i**:  $\delta$  (ppm) 8.46 (s, 1H), 7.98 (s, 1H), 7.79–7.71 (m, 3H), 7.63 (dd,  $J = 8.5, 1.4$  Hz, 1H), 7.47–7.39 (m, 2H), 7.32–7.27 (m, 1H), 6.67 (d,  $J = 1.3$  Hz, 1H), 6.65 (t,  $J = 1.9$  Hz, 1H), 6.07 (s, 1H), 5.80 (dd,  $J = 21.0, 9.6$  Hz, 1H), 4.27–3.59 (m, 6H) 2.76 (t,  $J = 6.3$  Hz, 2H), 2.29 (s, 3H), 1.34 (t,  $J = 7.1$  Hz, 3H), 1.02 (t,  $J = 7.1$  Hz, 3H).  $^{31}\text{P}$ -NMR (202 MHz,  $\text{CDCl}_3$ )  $\delta$  (ppm) 21.44 (s). HRMS for  $\text{C}_{28}\text{H}_{31}\text{NO}_7\text{P}([\text{M} + \text{H}]^+)$ : calcd 524.18381; found 524.18213.

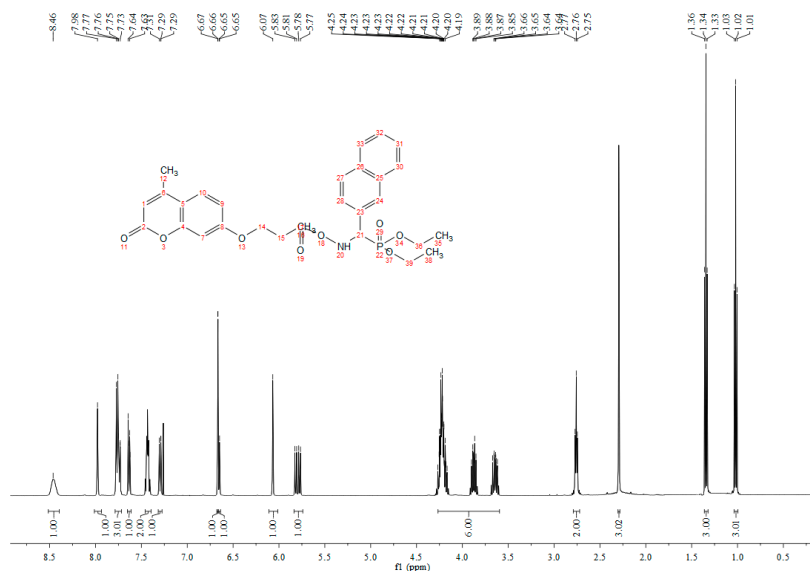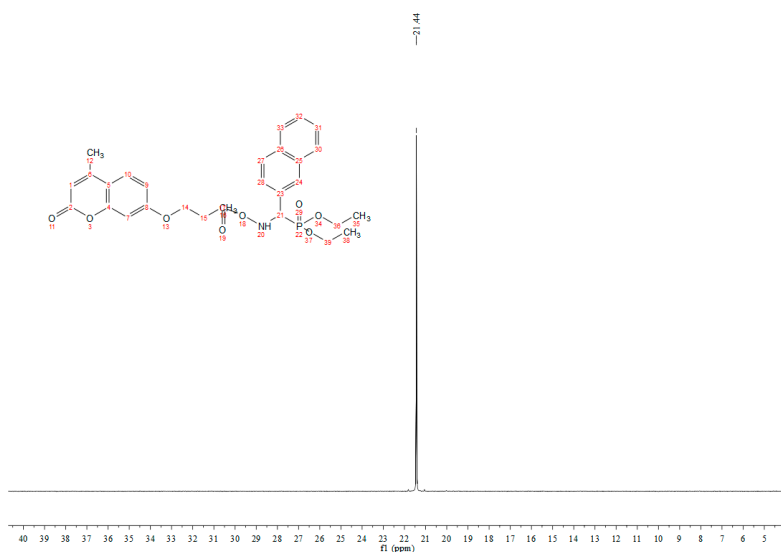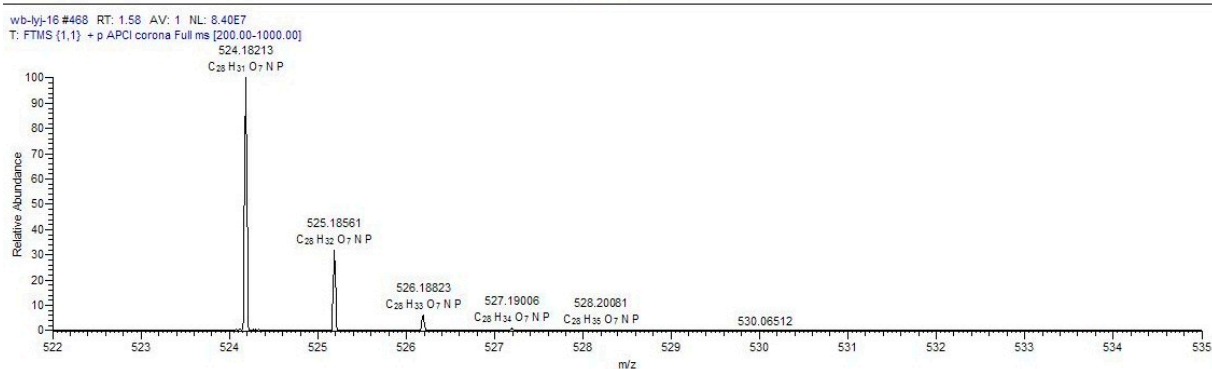

Figure S44. Spectrum of compound **8i**.

$^1\text{H}$ -NMR (500 MHz,  $\text{CDCl}_3$ ) for complex **8j**:  $^1\text{H}$ -NMR (500 MHz,  $\text{CDCl}_3$ )  $\delta$ (ppm) 8.45 (dd,  $J = 9.6$ , 3.4 Hz, 1H), 7.62–7.45 (m, 2H), 7.42 (d,  $J = 8.8$  Hz, 1H), 7.29 (dd,  $J = 7.9$ , 4.1 Hz, 3H), 6.75 (dd,  $J = 8.8$ , 2.5 Hz, 1H), 6.70 (d,  $J = 2.5$  Hz, 1H), 6.09 (d,  $J = 1.1$  Hz, 1H), 4.34–4.22 (m, 2H), 4.22–3.67 (m, 4H), 2.78 (td,  $J = 6.2$ , 2.7 Hz, 2H), 2.34 (d,  $J = 1.0$  Hz, 3H), 2.10 (d,  $J = 16.1$  Hz, 1H), 1.31 (t,  $J = 7.1$  Hz, 3H), 1.09 (t,  $J = 7.1$  Hz, 3H).  $^{31}\text{P}$ -NMR (202 MHz,  $\text{CDCl}_3$ )  $\delta$  (ppm) 21.33 (s). HRMS for  $\text{C}_{25}\text{H}_{31}\text{NO}_7\text{P}$  ( $[\text{M} + \text{H}]^+$ ): calcd 488.18381; found 488.18231.

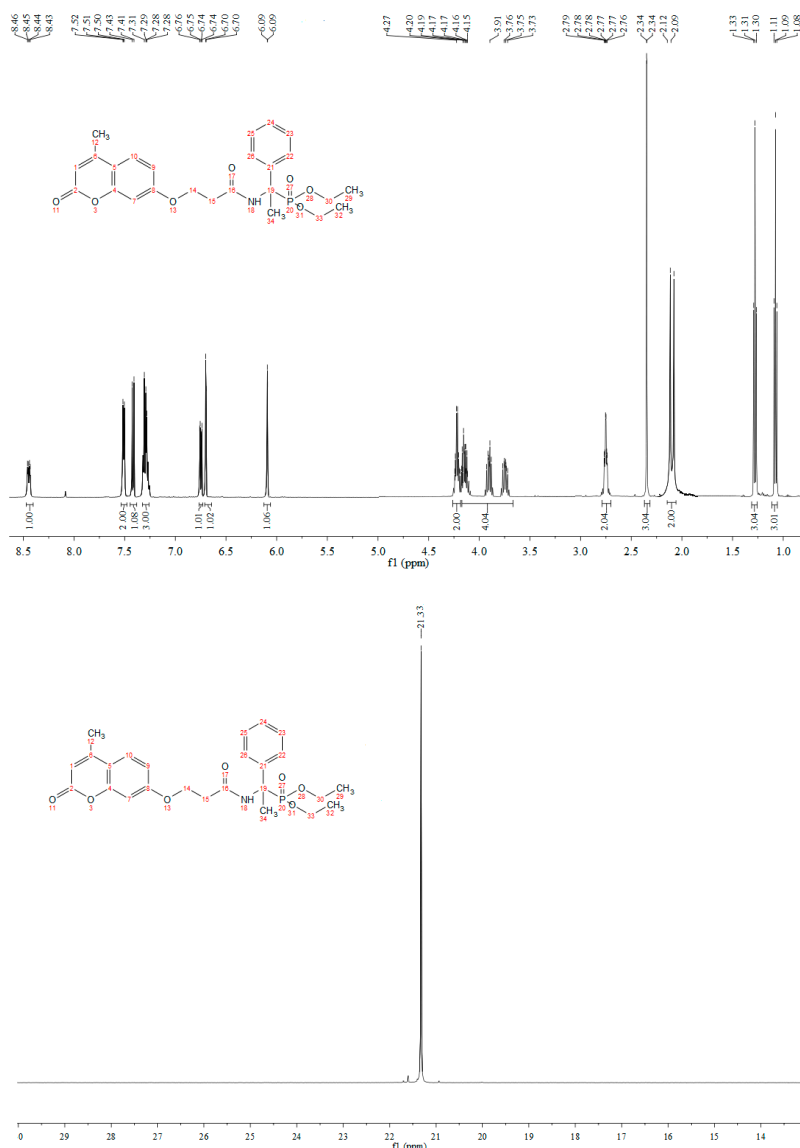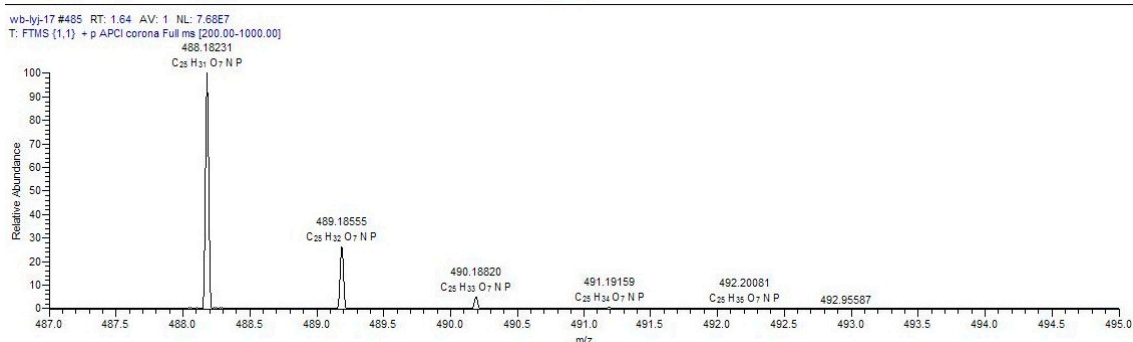

Figure S45. Spectrum of compound **8j**.
